# Supplementary material for: Challenges to code status discussions for pediatric patients
Source: PLoS One. 2017 Nov 2;12(11):e0187375. doi: 10.1371/journal.pone.0187375 (PMC5667871; doi:10.1371/journal.pone.0187375)
Supplement: S1 File — (PDF) [file pone.0187375.s001.pdf]

Date   \_\_/\_\_/\_\_\_\_

Q1.    What is your primary Division at LPCH?

- 1 ☐ PICU
- 2 ☐ CV-ICU
- 3 ☐ NICU
- 4 ☐ Oncology
- 5 ☐ Hospitalist

Q2.    Which of the following best describes your current professional role at LPCH?

- 1 ☐ Respiratory Therapist
- 2 ☐ Fellow
- 3 ☐ Resident
- 4 ☐ Nurse
- 5 ☐ Social Worker
- 6 ☐ Attending
- 7 ☐ Advanced Nurse Practitioner
- 8 ☐ Physician Assistant

Q3.    How long have you been in your current position at LPCH? \_\_\_\_\_

Q4.    How familiar are you with code status options that are available, other than Full Code, at LPCH?

- 1 ☐ Very Familiar
- 2 ☐ Somewhat Familiar
- 3 ☐ Not Very Familiar
- 4 ☐ Not Familiar at All

Q5.    As far as you know, what are the code options that are available at LPCH?

|      |                 |      |             |      |             |
|------|-----------------|------|-------------|------|-------------|
| Code | <div>Full</div> | Code | <div></div> | Code | <div></div> |
| Code | <div></div>     | Code | <div></div> | Code | <div></div> |
| Code | <div></div>     | Code | <div></div> | Code | <div></div> |

Q6.    Please circle the number that best corresponds to your level of comfort having discussions with your patient’s families about changing code status.

|  |             |   |   |               |   |   |   |
|--|-------------|---|---|---------------|---|---|---|
|  | 1           | 2 | 3 | 4             | 5 | 6 | 7 |
|  | COMFORTABLE |   |   | UNCOMFORTABLE |   |   |   |

Q7.    What is your opinion about the timing of discussions about changing code status that have taken place in your Division with families over the last 6 months? Have the discussions with families taken place sooner than they should have, at about the right time, or later than they should have?

- 1 ☐ Much too soon
- 2 ☐ Too soon
- 3 ☐ About the right time
- 4 ☐ Too late
- 5 ☐ Much too late

Q8.    In your experience over the last 6 months, how receptive or resistant have families been to discussing a change in code status?

|  |           |   |   |           |   |   |   |
|--|-----------|---|---|-----------|---|---|---|
|  | 1         | 2 | 3 | 4         | 5 | 6 | 7 |
|  | RECEPTIVE |   |   | RESISTANT |   |   |   |

Q9.    In the last 6 months, how often would you say you have had conversations with other staff in your Division about a potential change in code status for a patient?

- 1 ☐ Never
- 2 ☐ Rarely
- 3 ☐ Sometimes
- 4 ☐ Often

Q10.   Within the last 6 months, have you experienced any of the following type meetings, educational interventions, or specific inclusion of **expanded code status options** at LPCH? Please check all that apply.

- 1 ☐ Division lecture, seminar or presentation
- 2 ☐ Rounding checklist that includes discussion of code status
- 3 ☐ Safety rounds or huddles that include discussion of code status
- 4 ☐ EMR prompt specific to code status
- 5 ☐ Hospital-wide lecture, seminar or presentation e.g., Grand Rounds
- 6 ☐ Other. Please describe. \_\_\_\_\_
